# Supplementary material
Source: Springer Nature journal article supplement (https://www.springermedizin.de/resource/supplementary/12873_2011_164_MOESM6_ESM.pdf/9431566)

# Top 7 major complaints of LWBS Patients

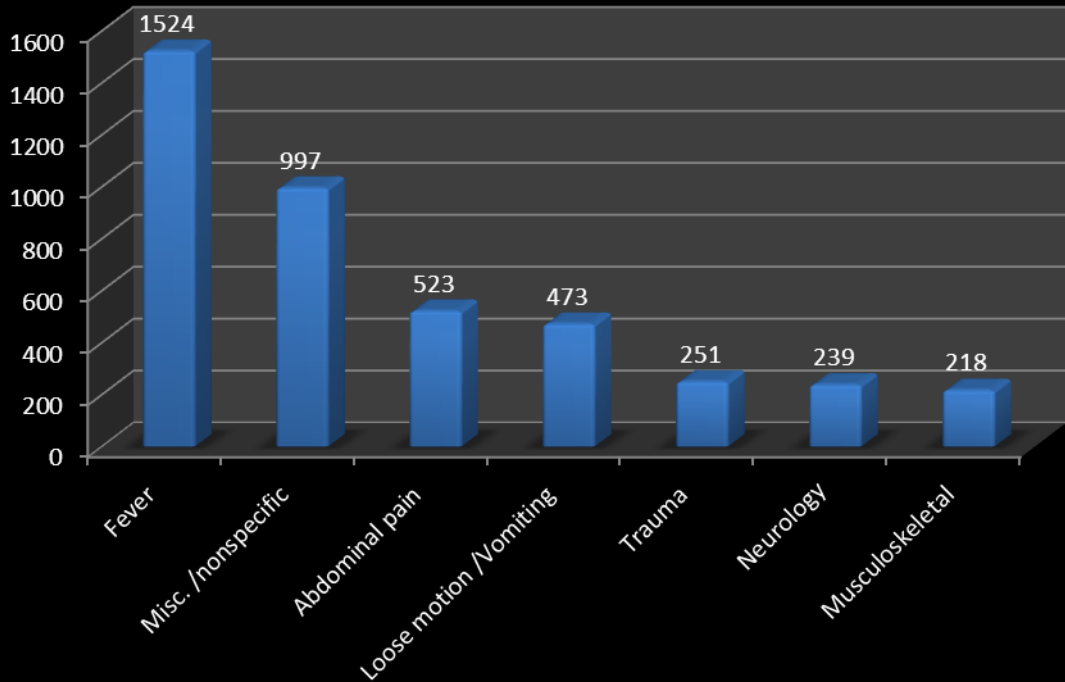

Supplement: MOESM6 [file 9431566]
